# Supplementary material for: Delphinidin attenuates pathological cardiac hypertrophy via the AMPK/NOX/MAPK signaling pathway
Source: publisher site journal article supplement (doi:10.18632/aging.102956), 2020-03-25
Supplement: Supplementary file [file aging-v12i6-102956-supplementary-material-SD2.pdf]

## SUPPLEMENTARY TABLE

Supplementary Table 1. The primer sequence for qRT-PCR.

| Gene               | Forward primer               | Reverse primer                  |
|--------------------|------------------------------|---------------------------------|
| Mouse-ANP          | 5'-ACCTGCTAGACCACCTGGAG-3'   | 5'-CCTTGGCTGTTATCTTCGGTACCGG-3' |
| Mouse-β-MHC        | 5'-CCGAGTCCCAGGTCAACAA-3'    | 5'-CTTACGGGCACCCTTGGA-3'        |
| Mouse-GAPDH        | 5'-ACTCCACTCACGGCAAATT C-3'  | 5'-TCTCCATGGTGGTGAAGACA-3'      |
| Mouse-BNP          | 5'-GAGGTCACCTCTATCCTCT-3'    | 5'-GCCATTTCTCCGACTTTTCTC-3'     |
| Mouse-Collagen-1   | 5'-AGGCTTCAGTGGTTTGGATG-3'   | 5'-CACCAACAGCACCATCGTTA-3'      |
| Mouse-Collagen-III | 5'-CCCAACCCAGAGATCCCATT-3'   | 5'-GAAGCACAGGAGCAGGTGTAGA-3'    |
| Mouse-CTGF         | 5'-TGACCCCTGCGACCCACA-3'     | 5'-TACACCGACCCACCGAAGACACAG-3'  |
| Rat-ANP            | 5'-TGAGCGAGCAGACCGATGAAGC-3' | 5'-GCCGCGCCCGAGAGCAC-3'         |
| Rat-β-MHC          | 5'-TGAAGAGCACATGGCCACCGATAG  | 5'-ATGGCGCCTGTCAGCTTGAAATG-3'   |
| Rat-BNP            | 5'-CAGCAGCTTCTGCATCGTGGAT-3' | 5'-TTCCTTAATCTGTCGCCGCTGG-3'    |
| Rat-GAPDH          | 5'-CATGGCCTCCGTGTTCTACCC-3'  | 5'-GCCGCCTGCTTACCACCTTCT-3'     |
